# Supplementary material for: Origins of amyloid-β
Source: PubMed Central journal article supplement (PMC3660159; doi:10.1186/1471-2164-14-290), 2013-04-30
Supplement: 1471-2164-14-290-S1.pdf [file 1471-2164-14-290-S1.pdf]

## Tharp and Sarkar

### Origins of Amyloid- $\beta$

#### Supplementary Data

**Supplementary Figure 1** – Phylogenetic Relationships among the Amyloid- $\beta$  Precursor Protein Gene Family from Bayesian Inference. **a**, Phylogram showing the evolutionary relationships among the nucleotide sequences of the A $\beta$ PP gene family. **b**, Phylogram for the corresponding protein sequences. Trees were generated by Bayesian inference methods and show posterior probability values at each node.

**Supplementary Figure 2** – Branch Supports for Phylogenetic Trees. Symmetric bootstrap re-sampling and Bremer supports, for nucleotide trees (**a** and **b**, respectively) and for amino acid trees (**c** and **d**, respectively).

**Supplementary Table 1** – Taxa Species Names and Sequence Accession Numbers

# Supplementary Figure 1a

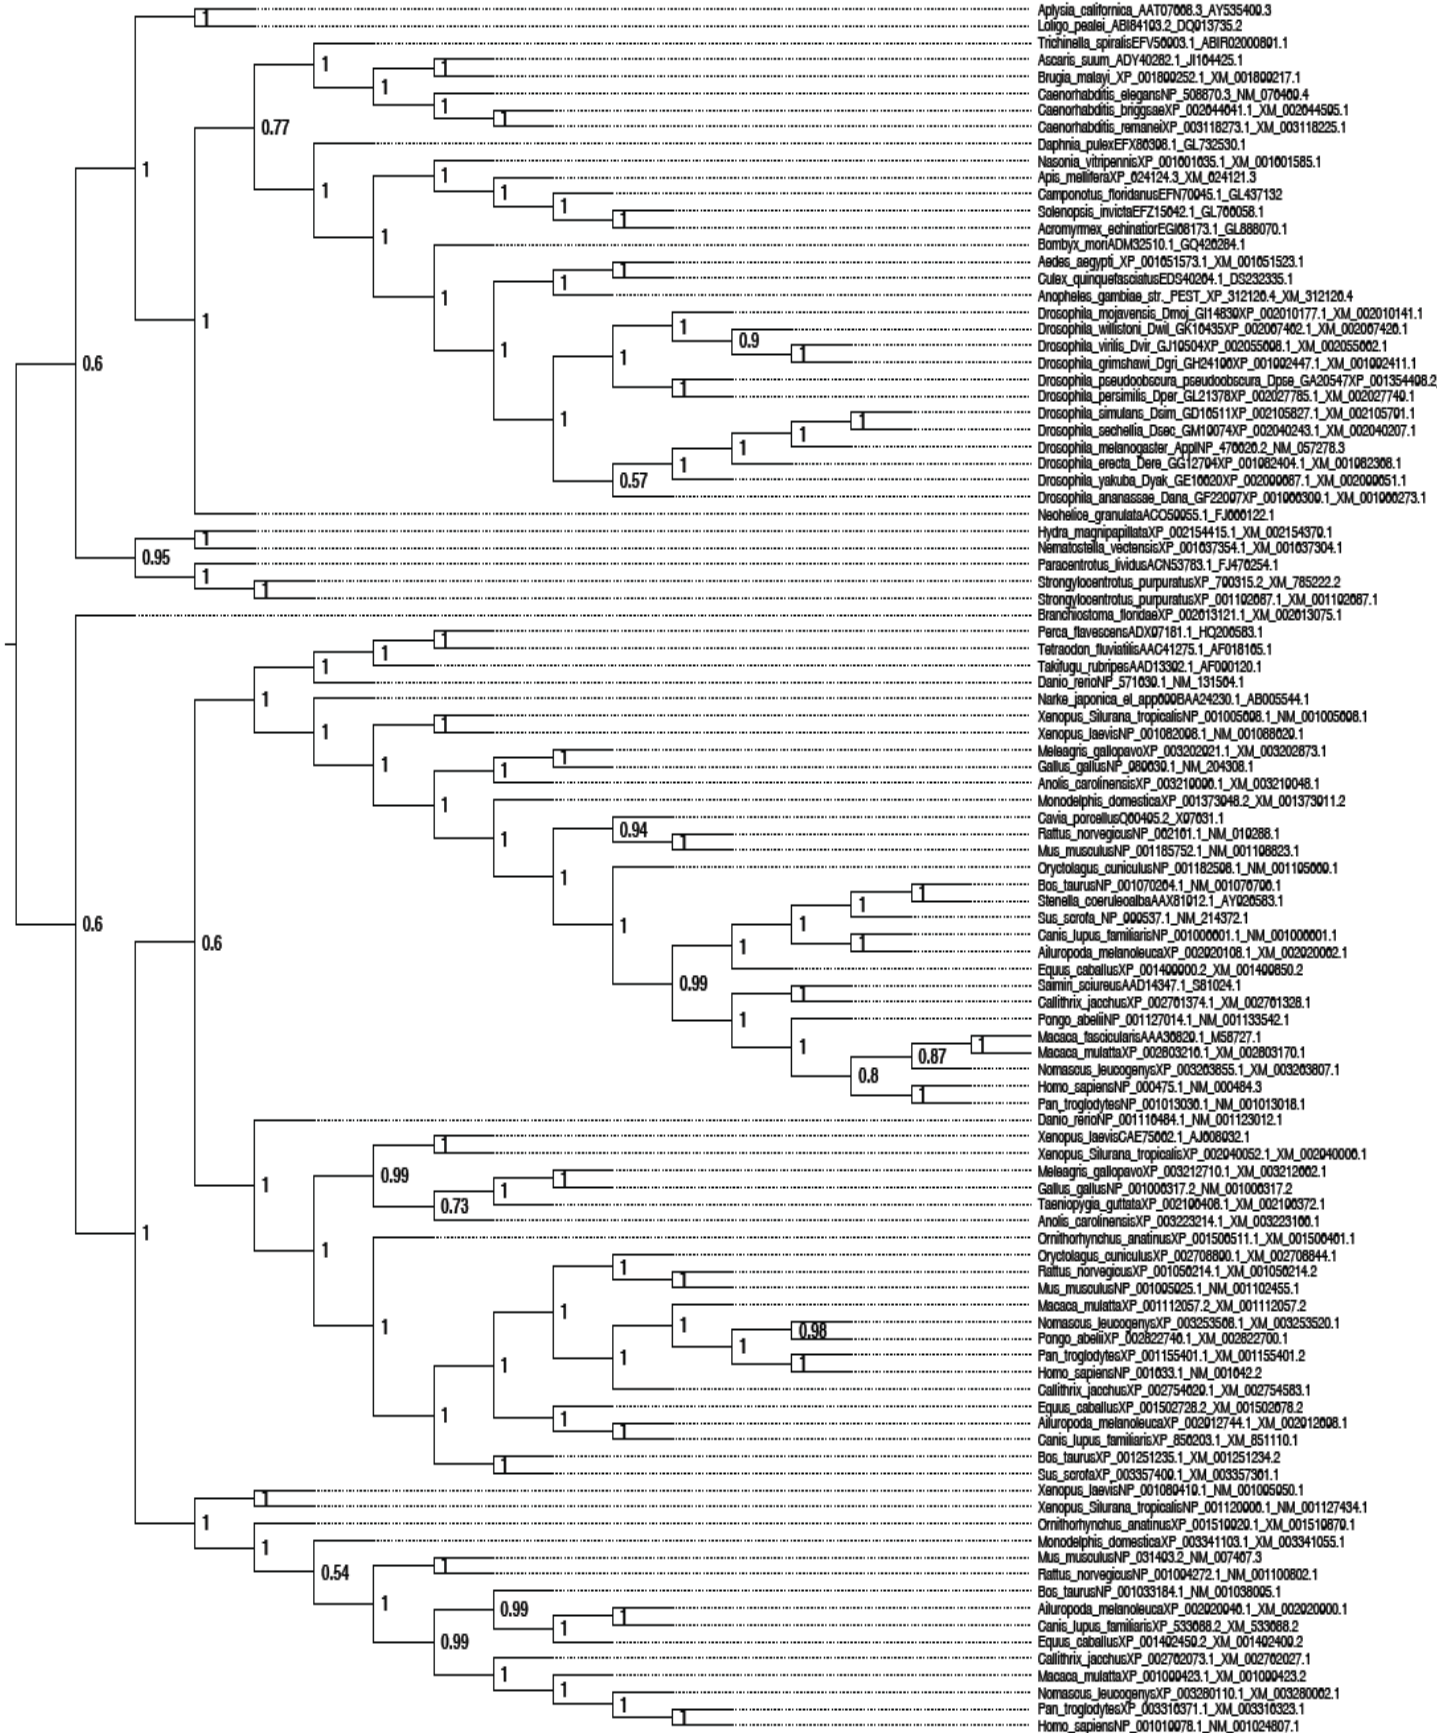

# Supplementary Figure 1b

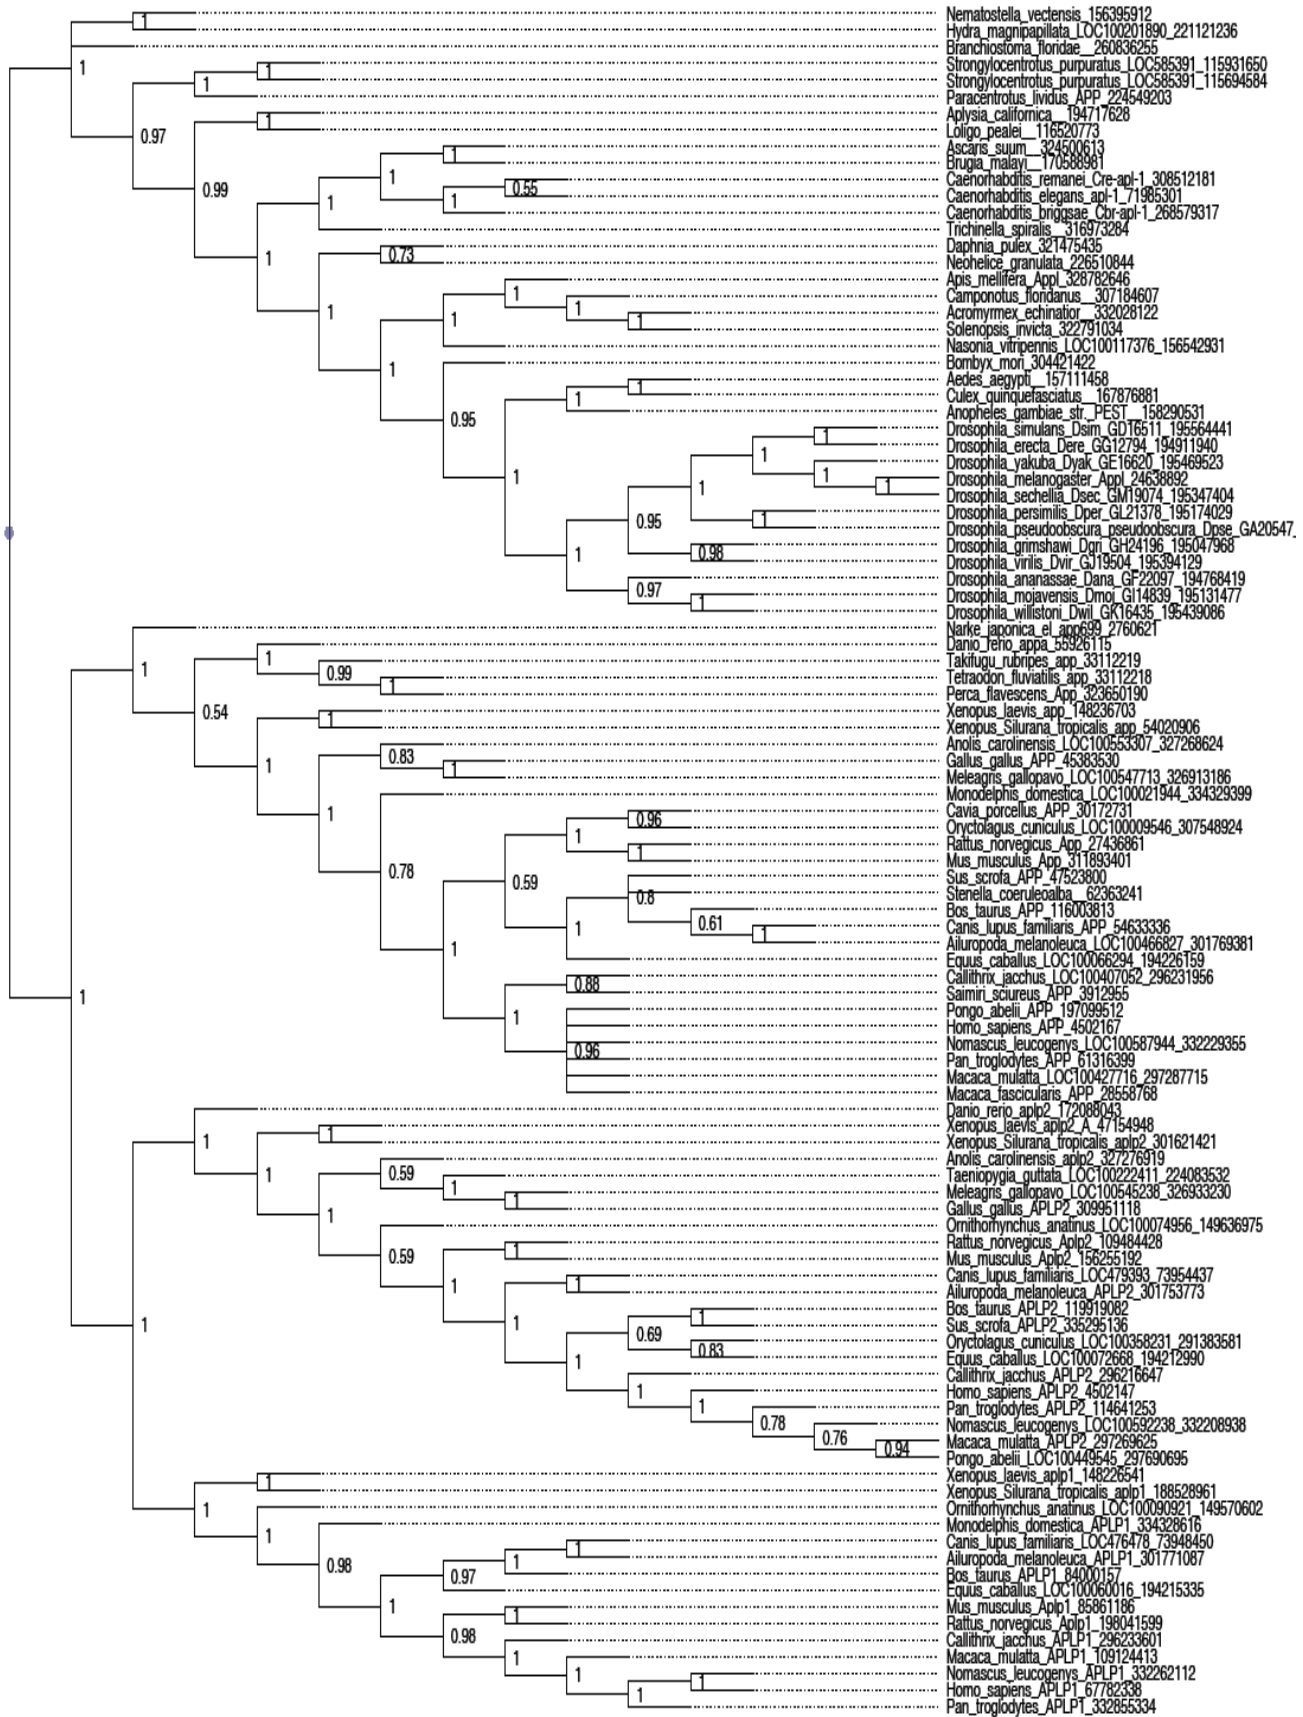

# Supplementary Figure 2a

Group freqs., 100 replicates, cut=50 (tree 0) - Symmetric Resampling (P=33)/GC values, 100 replicates, cut=0 (tree 1) - Symmetric Resampling (P=33)

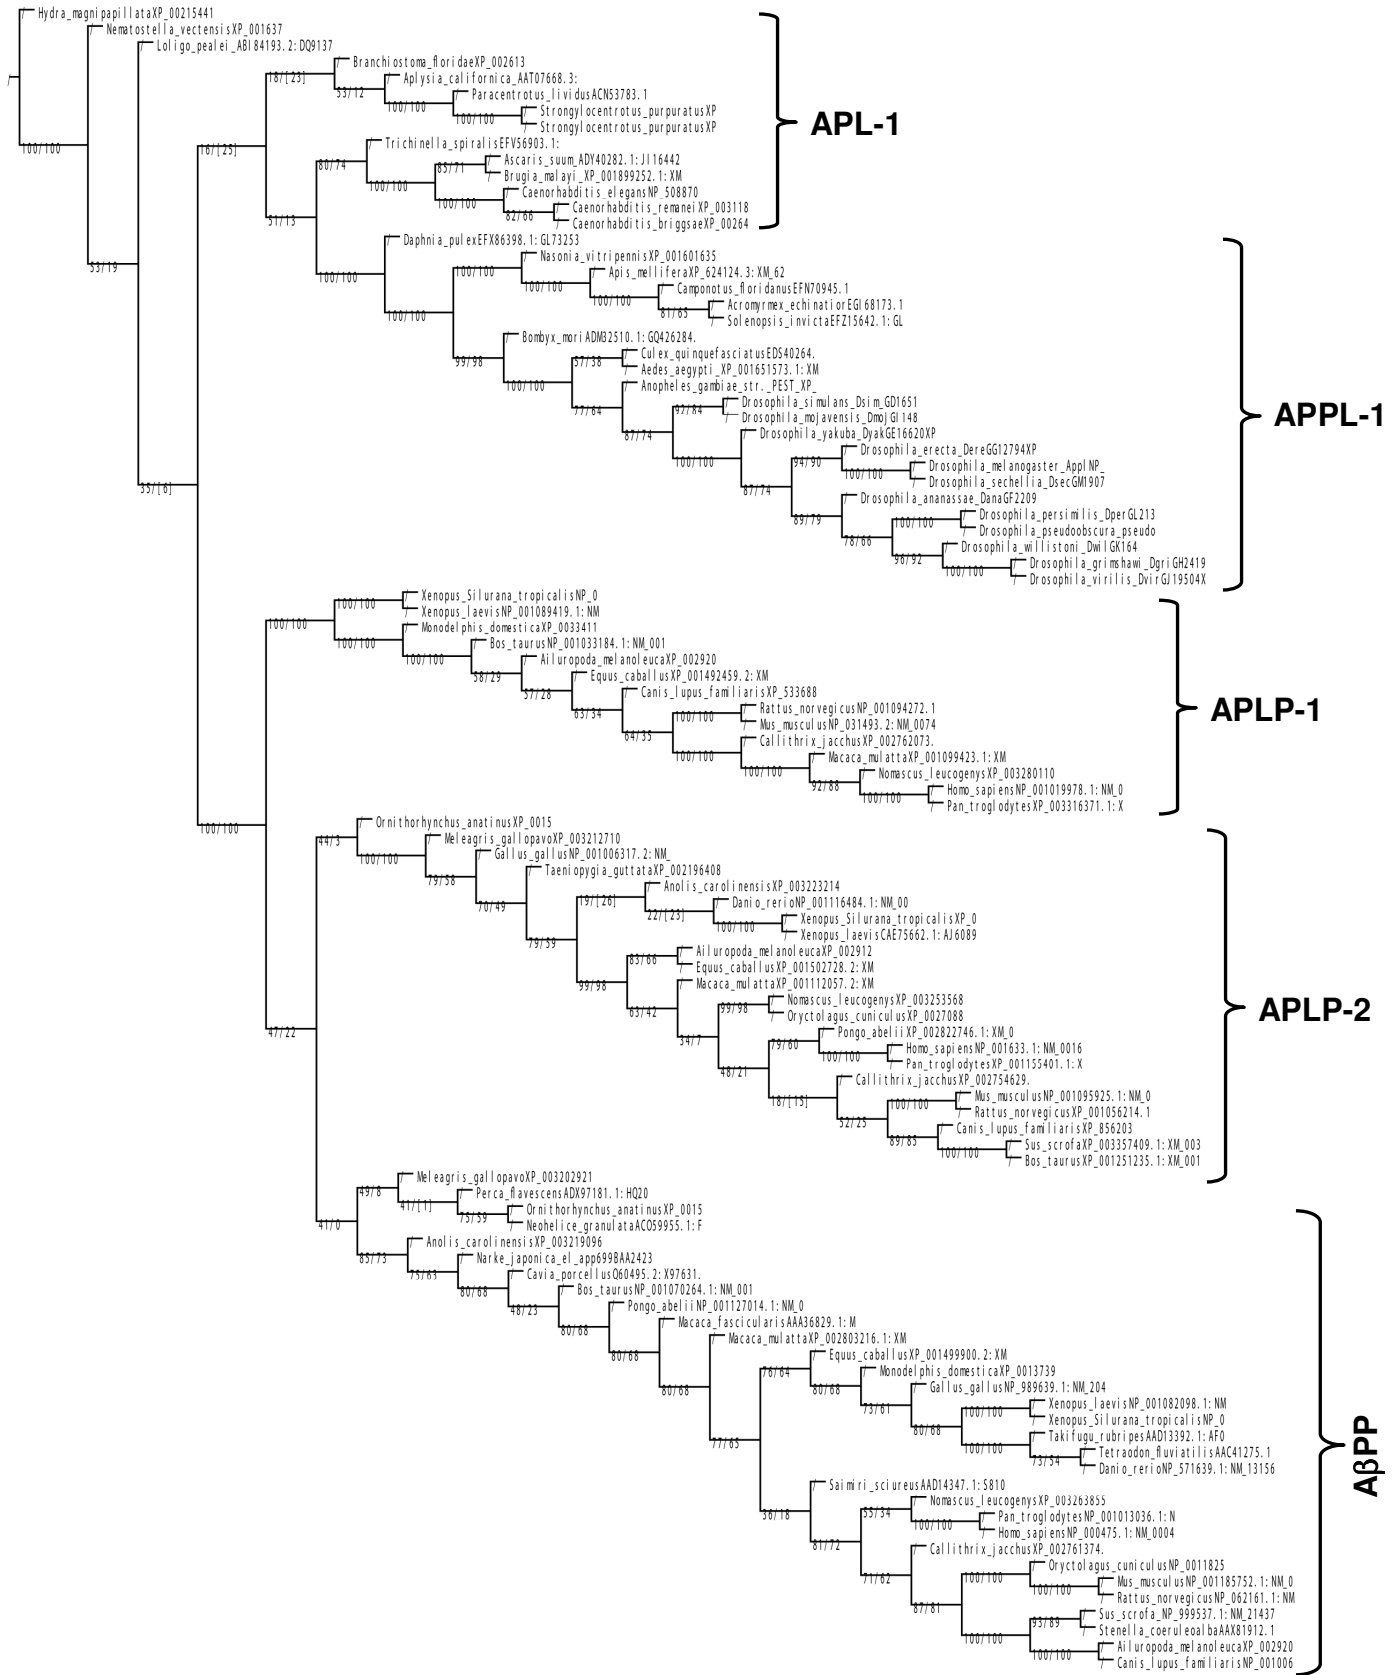

# Supplementary Figure 2b

Bremer supports (from 131 trees, cut 0)/Relative bremer supports (from 119 trees, cut 0)

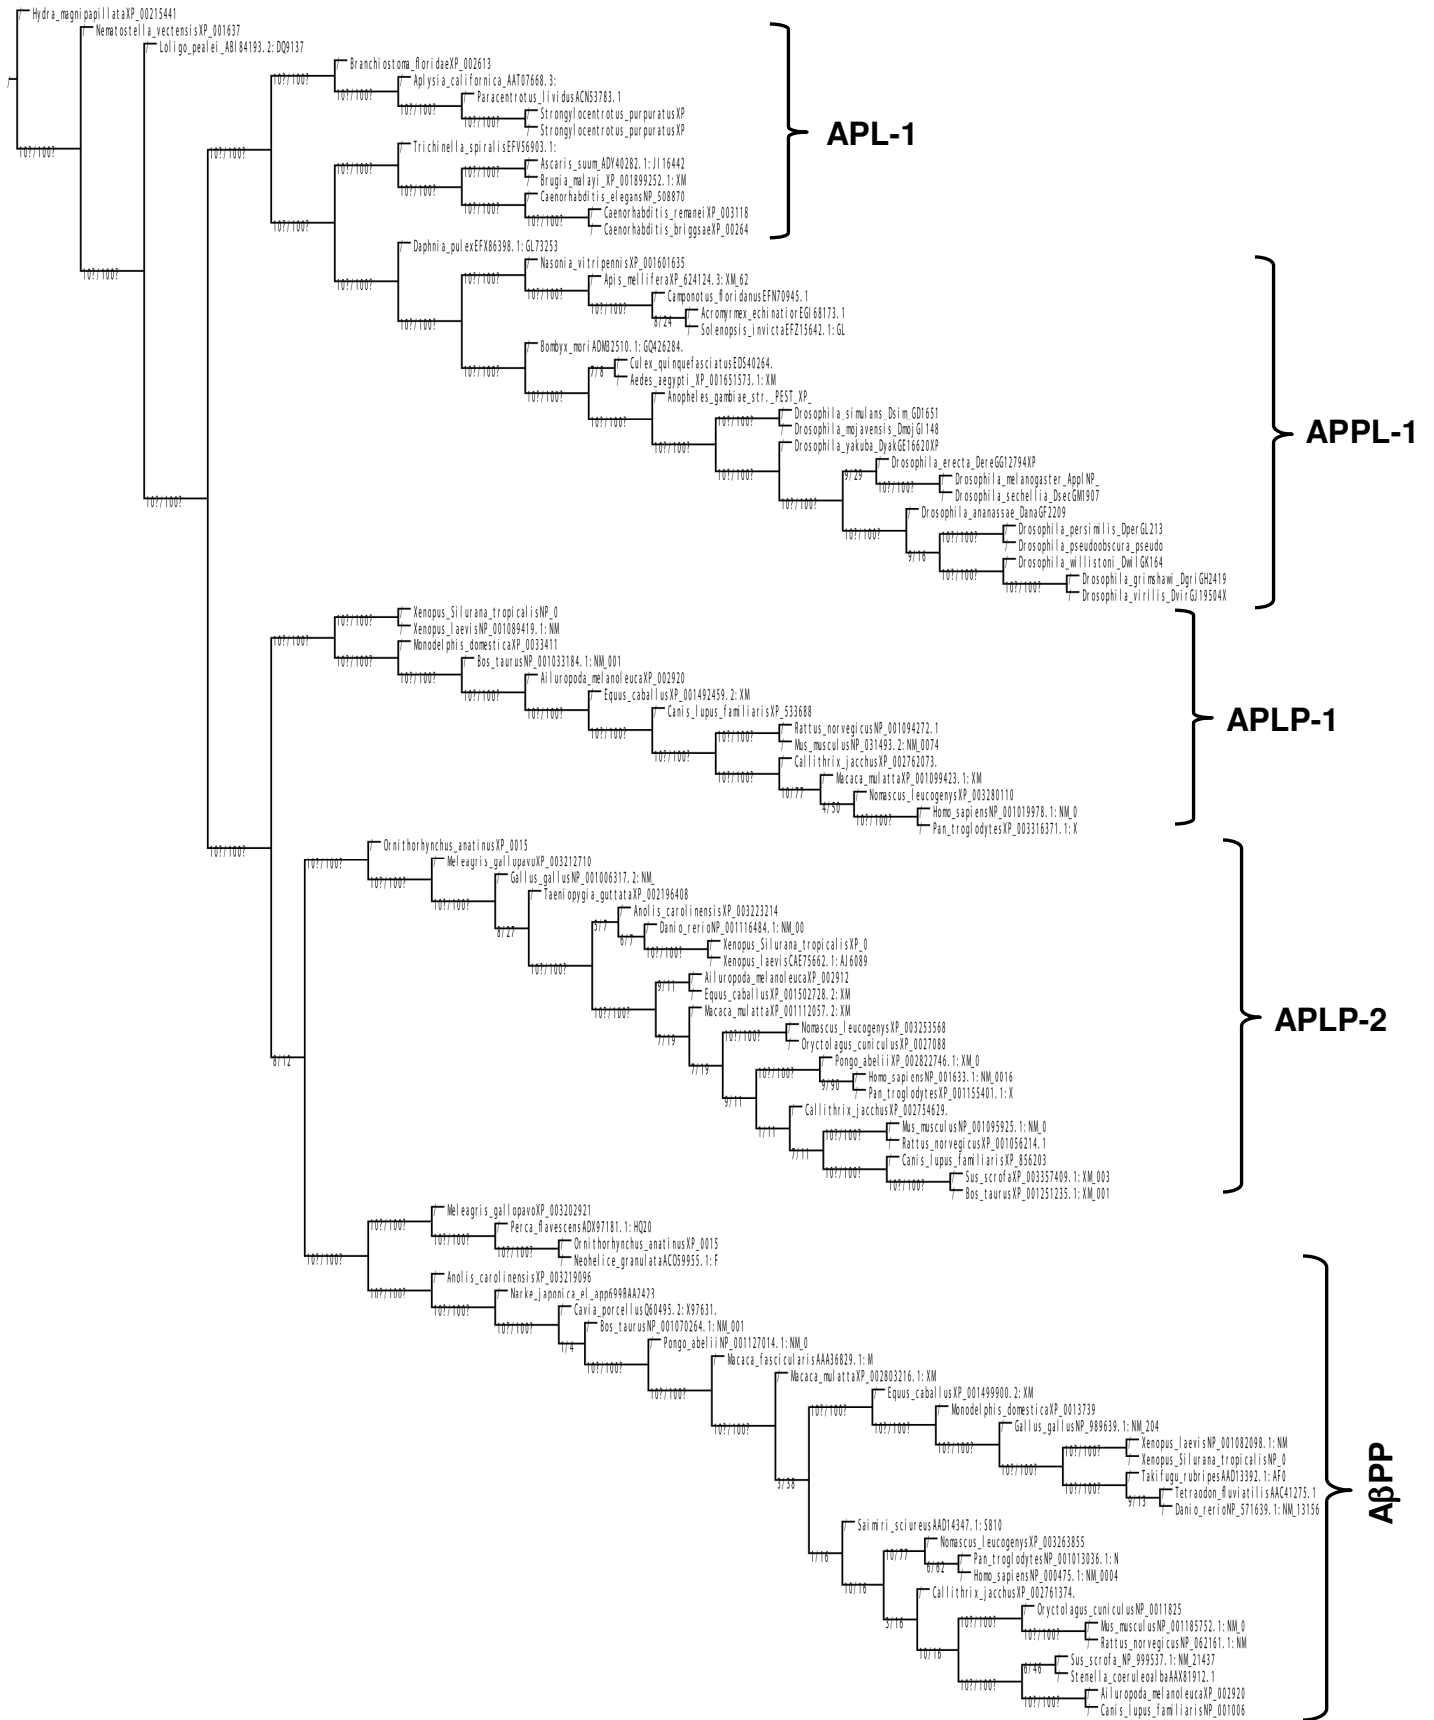

# Supplementary Figure 2c

Group freqs., 100 replicates, cut=50 (tree 0) - Symmetric Resampling (P=33)/GC values, 100 replicates, cut=0 (tree 1) - Symmetric Resampling (P=33)

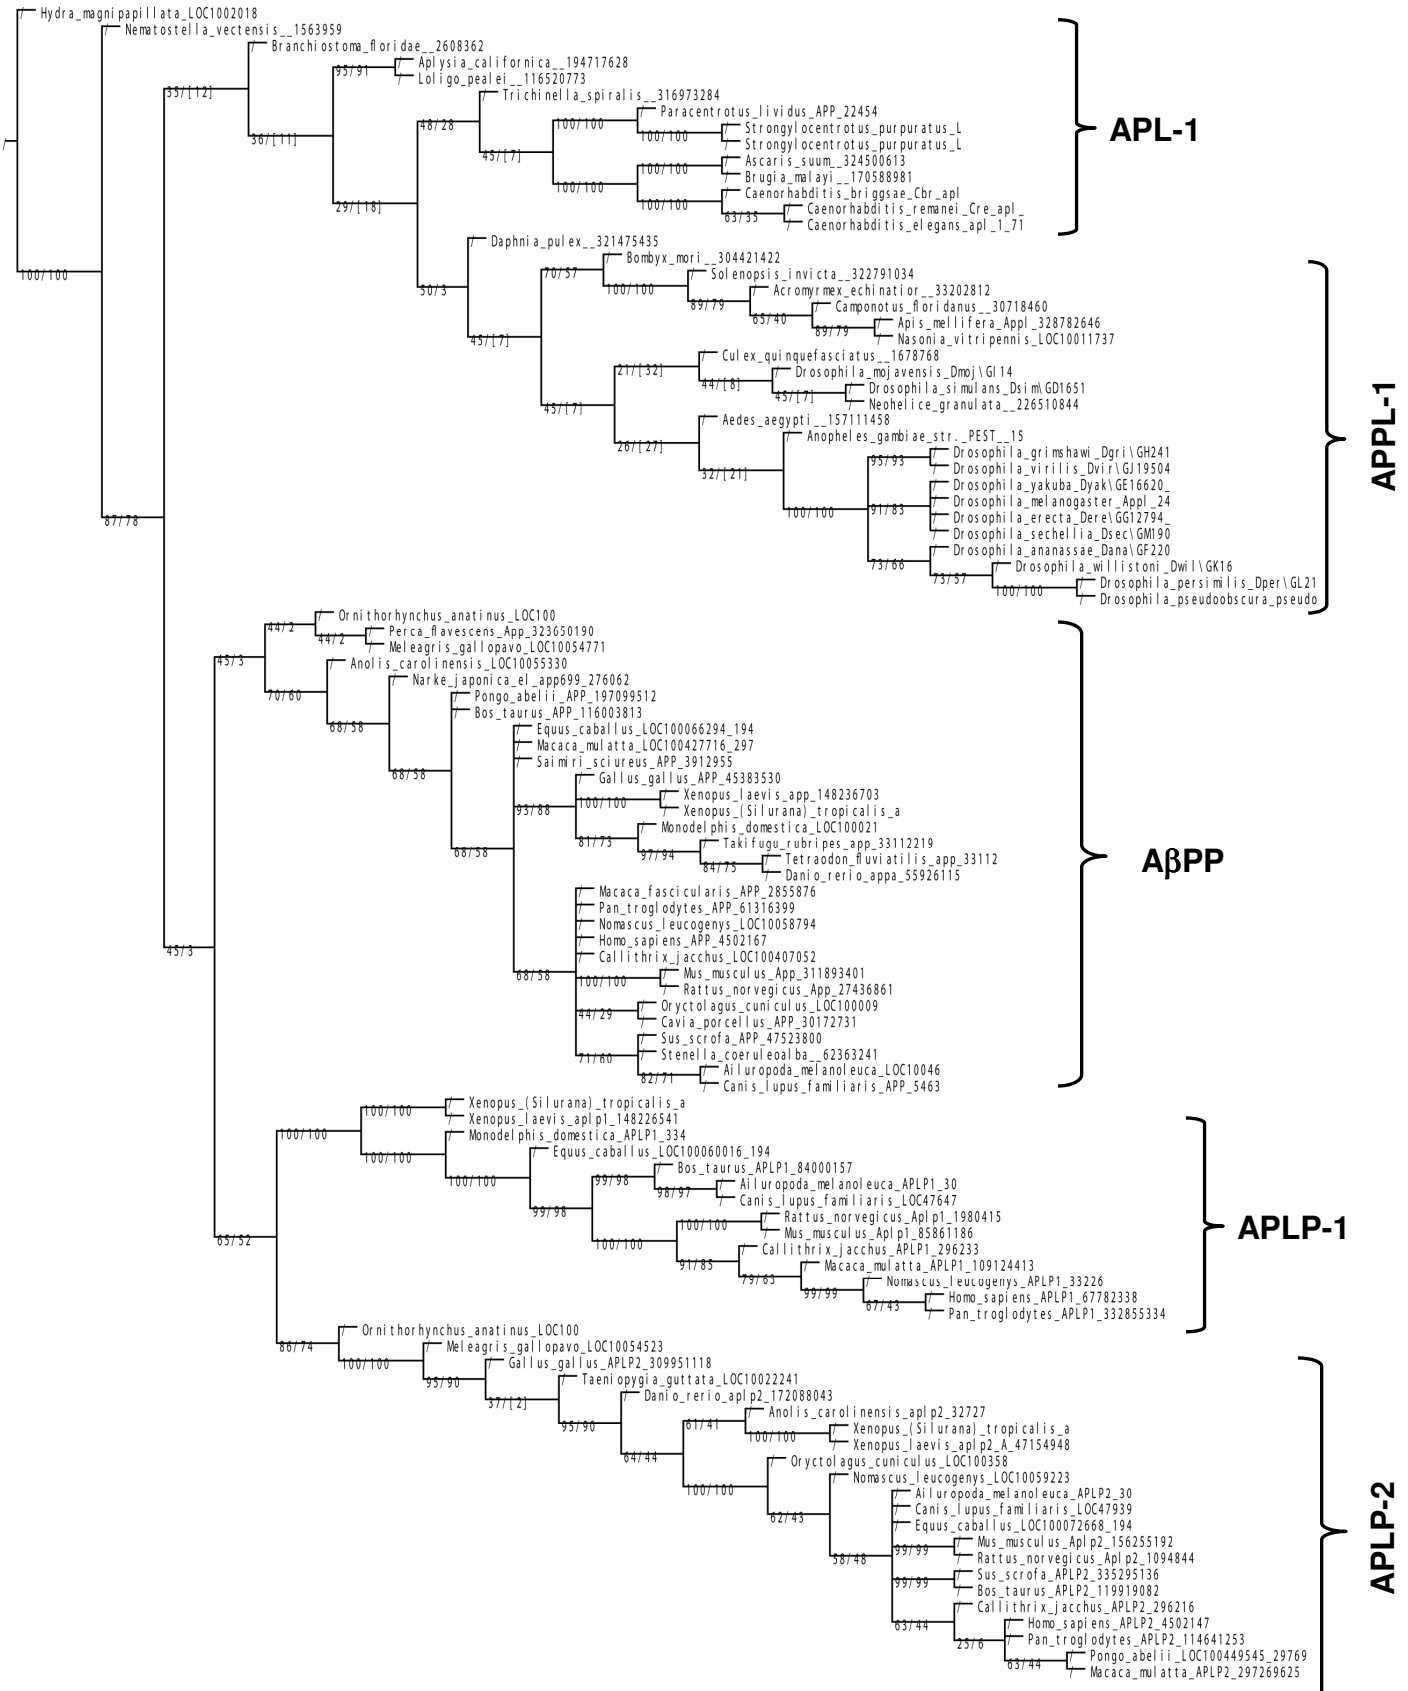

# Supplementary Figure 2d

Bremer supports (from 103714 trees, cut 0)/Relative bremer supports (from 43748 trees, cut 0)

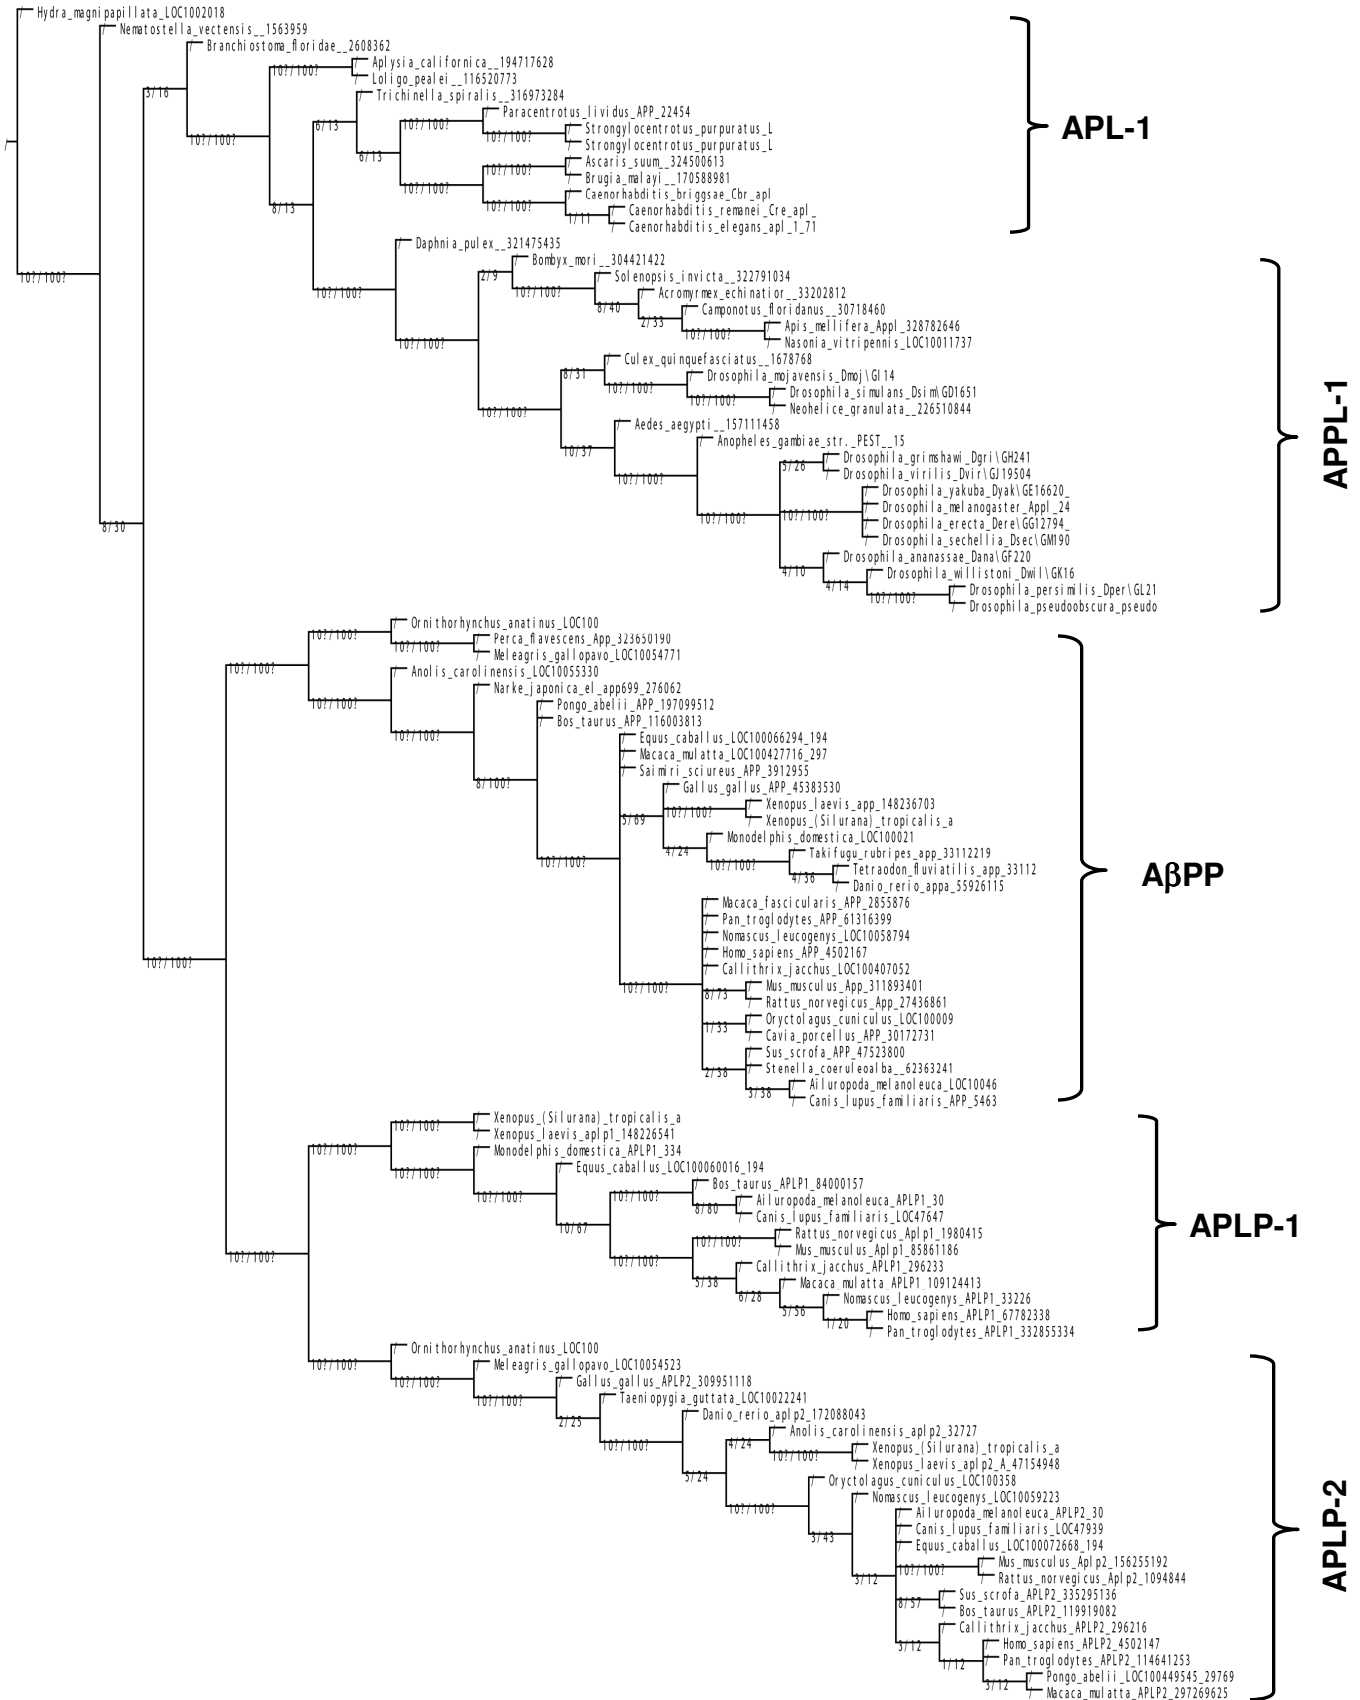

# Supplementary Table 1

## Taxa Species Names and Sequence Accession Numbers

| <u>Species Names</u>               | <u>Protein Accession</u> | <u>Nucleotide Accession</u> |
|------------------------------------|--------------------------|-----------------------------|
| <i>Acromyrmex echinatior</i>       | EGI68173.1               | GL888070.1                  |
| <i>Aedes aegypti</i>               | XP 001651573.1           | XM 001651523.1              |
| <i>Ailuropoda melanoleuca</i>      | XP 002920108.1           | XM 002920062.1              |
| <i>Ailuropoda melanoleuca</i>      | XP 002912744.1           | XM 002912698.1              |
| <i>Ailuropoda melanoleuca</i>      | XP 002920946.1           | XM 002920900.1              |
| <i>Anolis carolinensis</i>         | XP 003219096.1           | XM 003219048.1              |
| <i>Anolis carolinensis</i>         | XP 003223214.1           | XM 003223166.1              |
| <i>Anopheles gambiae</i> str. PEST | XP 312126.4              | XM 312126.4                 |
| <i>Apis mellifera</i>              | XP 624124.3              | XM 624121.3                 |
| <i>Aplysia californica</i>         | AAT07668.3               | AY535409.3                  |
| <i>Ascaris suum</i>                | ADY40282.1               | J1164425.1                  |
| <i>Bombyx mori</i>                 | ADM32510.1               | GQ426284.1                  |
| <i>Bos taurus</i>                  | NP 001070264.1           | NM 001076796.1              |
| <i>Bos taurus</i>                  | XP 001251235.1           | XM 001251234.2              |
| <i>Bos taurus</i>                  | NP 001033184.1           | NM 001038095.1              |
| <i>Branchiostoma floridae</i>      | XP 002613121.1           | XM 002613075.1              |
| <i>Brugia malayi</i>               | XP 001899252.1           | XM 001899217.1              |
| <i>Caenorhabditis briggsae</i>     | XP 002644641.1           | XM 002644595.1              |
| <i>Caenorhabditis elegans</i>      | NP 508870.3              | NM 076469.4                 |
| <i>Caenorhabditis remanei</i>      | XP 003118273.1           | XM 003118225.1              |
| <i>Callithrix jacchus</i>          | XP 002761374.1           | XM 002761328.1              |
| <i>Callithrix jacchus</i>          | XP 002754629.1           | XM 002754583.1              |
| <i>Callithrix jacchus</i>          | XP 002762073.1           | XM 002762027.1              |
| <i>Camponotus floridanus</i>       | EFN70945.1               | GL437132                    |
| <i>Canis lupus familiaris</i>      | NP 001006601.1           | NM 001006601.1              |
| <i>Canis lupus familiaris</i>      | XP 856203.1              | XM 851110.1                 |
| <i>Canis lupus familiaris</i>      | XP 533688.2              | XM 533688.2                 |
| <i>Cavia porcellus</i>             | Q60495.2                 | X97631.1                    |
| <i>Culex quinquefasciatus</i>      | EDS40264.1               | DS232335.1                  |
| <i>Danio rerio</i>                 | NP 571639.1              | NM 131564.1                 |
| <i>Danio rerio</i>                 | NP 001116484.1           | NM 001123012.1              |
| <i>Daphnia pulex</i>               | EFX86398.1               | GL732530.1                  |



## Supplementary Table 1 Continued

| <u>Species Names</u>                                | <u>Protein Accession</u> | <u>NT Accession</u> |
|-----------------------------------------------------|--------------------------|---------------------|
| Drosophila ananassae Dana\GF22097                   | XP 001966309.1           | XM 001966273.1      |
| Drosophila erecta Dere\GG12794                      | XP 001982404.1           | XM 001982368.1      |
| Drosophila grimshawi Dgri\GH24196                   | XP 001992447.1           | XM 001992411.1      |
| Drosophila melanogaster Appl                        | NP 476626.2              | NM 057278.3         |
| Drosophila mojavensis Dmoj\GI14839                  | XP 002010177.1           | XM 002010141.1      |
| Drosophila persimilis Dper\GL21378                  | XP 002027785.1           | XM 002027749.1      |
| Drosophila pseudoobscura pseudoobscura Dpse\GA20547 | XP 001354498.2           | XM 001354462.2      |
| Drosophila sechellia Dsec\GM19074                   | XP 002040243.1           | XM 002040207.1      |
| Drosophila simulans Dsim\GD16511                    | XP 002105827.1           | XM 002105791.1      |
| Drosophila virilis Dvir\GJ19504                     | XP 002055698.1           | XM 002055662.1      |
| Drosophila willistoni Dwil\GK16435                  | XP 002067462.1           | XM 002067426.1      |
| Drosophila yakuba Dyak\GE16620                      | XP 002099687.1           | XM 002099651.1      |
| Equus caballus                                      | XP 001499900.2           | XM 001499850.2      |
| Equus caballus                                      | XP 001502728.2           | XM 001502678.2      |
| Equus caballus                                      | XP 001492459.2           | XM 001492409.2      |
| Gallus gallus                                       | NP 989639.1              | NM 204308.1         |
| Gallus gallus                                       | NP 001006317.2           | NM 001006317.2      |
| Homo sapiens                                        | NP 000475.1              | NM 000484.3         |
| Homo sapiens                                        | NP 001633.1              | NM 001642.2         |
| Homo sapiens                                        | NP 001019978.1           | NM 001024807.1      |
| Hydra magnipapillata                                | XP 002154415.1           | XM 002154379.1      |
| Loligo pealei                                       | ABI84193.2               | DQ913735.2          |
| Macaca fascicularis                                 | AAA36829.1               | M58727.1            |
| Macaca mulatta                                      | XP 002803216.1           | XM 002803170.1      |
| Macaca mulatta                                      | XP 001112057.2           | XM 001112057.2      |
| Macaca mulatta                                      | XP 001099423.1           | XM 001099423.2      |
| Meleagris gallopavo                                 | XP 003202921.1           | XM 003202873.1      |
| Meleagris gallopavo                                 | XP 003212710.1           | XM 003212662.1      |
| Monodelphis domestica                               | XP 001373948.2           | XM 001373911.2      |
| Monodelphis domestica                               | XP 003341103.1           | XM 003341055.1      |
| Mus musculus                                        | NP 001185752.1           | NM 001198823.1      |
| Mus musculus                                        | NP 001095925.1           | NM 001102455.1      |

## Supplementary Table 1 Continued

| <u>Species Names</u>          | <u>Protein Accession</u> | <u>NT Accession</u> |
|-------------------------------|--------------------------|---------------------|
| Mus musculus                  | NP 031493.2              | NM 007467.3         |
| Narke japonica el app699      | BAA24230.1               | AB005544.1          |
| Nasonia vitripennis           | XP 001601635.1           | XM 001601585.1      |
| Nematostella vectensis        | XP 001637354.1           | XM 001637304.1      |
| Neohelice granulata           | ACO59955.1               | FJ666122.1          |
| Nomascus leucogenys           | XP 003263855.1           | XM 003263807.1      |
| Nomascus leucogenys           | XP 003253568.1           | XM 003253520.1      |
| Nomascus leucogenys           | XP 003280110.1           | XM 003280062.1      |
| Ornithorhynchus anatinus      | XP 001506511.1           | XM 001506461.1      |
| Ornithorhynchus anatinus      | XP 001519929.1           | XM 001519879.1      |
| Oryctolagus cuniculus         | NP 001182598.1           | NM 001195669.1      |
| Oryctolagus cuniculus         | XP 002708890.1           | XM 002708844.1      |
| Pan troglodytes               | NP 001013036.1           | NM 001013018.1      |
| Pan troglodytes               | XP 001155401.1           | XM 001155401.2      |
| Pan troglodytes               | XP 003316371.1           | XM 003316323.1      |
| Paracentrotus lividus         | ACN53783.1               | FJ476254.1          |
| Perca flavescens              | ADX97181.1               | HQ206583.1          |
| Pongo abelii                  | NP 001127014.1           | NM 001133542.1      |
| Pongo abelii                  | XP 002822746.1           | XM 002822700.1      |
| Rattus norvegicus             | NP 062161.1              | NM 019288.1         |
| Rattus norvegicus             | XP 001056214.1           | XM 001056214.2      |
| Rattus norvegicus             | NP 001094272.1           | NM 001100802.1      |
| Saimiri sciureus              | AAD14347.1               | S81024.1            |
| Solenopsis invicta            | EFZ15642.1               | GL766058.1          |
| Stenella coeruleoalba         | AAX81912.1               | AY926583.1          |
| Strongylocentrotus purpuratus | XP 790315.2              | XM 785222.2         |
| Strongylocentrotus purpuratus | XP 001192687.1           | XM 001192687.1      |
| Sus scrofa                    | XP 003357409.1           | XM 003357361.1      |
| Sus scrofa                    | NP 999537.1              | NM 214372.1         |
| Taeniopygia guttata           | XP 002196408.1           | XM 002196372.1      |
| Takifugu rubripes             | AAD13392.1               | AF090120.1          |
| Tetraodon fluviatilis         | AAC41275.1               | AF018165.1          |

## Supplementary Table 1 Continued

| <u>Species Names</u>          | <u>Protein Accession</u> | <u>NT Accession</u> |
|-------------------------------|--------------------------|---------------------|
| Trichinella spiralis          | EFV56903.1               | ABIR02000891.1      |
| Xenopus (Silurana) tropicalis | NP 001005698.1           | NM 001005698.1      |
| Xenopus (Silurana) tropicalis | XP 002940052.1           | XM 002940006.1      |
| Xenopus (Silurana) tropicalis | NP 001120906.1           | NM 001127434.1      |
| Xenopus laevis                | NP 001082098.1           | NM 001088629.1      |
| Xenopus laevis                | CAE75662.1               | AJ608932.1          |
| Xenopus laevis                | NP 001089419.1           | NM 001095950.1      |
